# Supplementary material for: A NiMOF integrated with conductive materials for efficient bifunctional electrocatalysis of urea oxidation and oxygen evolution reactions
Source: Royal Society of Chemistry journal article supplement (doi:10.1039/d3dt03456a), 2024-01-01
Supplement: d3dt03456a1.pdf [file d3dt03456a1.pdf]

## Supporting Information

### **NiMOF integrated with conductive materials for efficient bifunctional electrocatalysis of urea oxidation and oxygen evolution reactions**

Xiaopei Xie<sup>1</sup>, Liqiang Xu<sup>1,2</sup>, Qingsheng Zeng<sup>1</sup>, Zhaona Zhang<sup>1</sup>, Zhiqi Xu<sup>1</sup>, Chuanxia Yin<sup>3</sup>,  
Xinxing Wang<sup>\*,1,4</sup>

1 Key Laboratory of Optic-electric Sensing and Analytical Chemistry for Life Science, MOE,  
Shandong Key Laboratory of Biochemical Analysis, College of Chemistry and Molecular  
Engineering, Qingdao University of Science and Technology, Qingdao 266042, China.

2 Shandong Tianyi Chemical Co., Ltd, Weifang 262737, China.

3 Marine Development and Fisheries Bureau of Kenli Distinct, Dongying 257500, China.

4 Xinjiang Blue Ridge Tunhe Degradable Materials Co., Ltd, Changji 831100, China.

\* Corresponding author

E-mail: wangxx@qust.edu.cn

- 1. Material characterization**
- 2. Product analysis**
- 3. Electrochemical measurements**
- 4. Equivalent circuit fitting results of Nquist plots obtained in urea solution**
- 5. CV curves of the NiMOF-based material modified electrodes scanned in the non-Faraday interval**
- 6. Comparison of UOR catalytic activity of Ni-based electrocatalysts on GCEs**
- 7. Forward sweep curve of LSV**
- 8. Equivalent circuit fitting results of Nquist plots obtained in KOH solution**
- 9. Comparison of OER catalytic activity of Ni-based electrocatalysts on GCEs**
- 10. Equivalent circuit fitting results of Nquist plots obtained in different concentrations of KOH solution with 0.33 mol L<sup>-1</sup> urea**
- 11. Calibration curves for N<sub>2</sub> and NO<sub>2</sub><sup>-</sup> determination**
- 12. Faradaic efficiency of N<sub>2</sub> and NO<sub>2</sub><sup>-</sup>**

## **1. Material characterization**

SEM pictures was observed by a field emission scanning electron microscope (JSM-7610). XRD patterns were measured using a X-ray powder diffractometer (Rigaku D-MAX 2500/PC). XPS were recorded from a X-ray photoelectron spectrometer (Thermo ESCALAB 250XI) equipped with a standard monochromatic Al-K $\alpha$  source ( $h\nu = 1486.6$  eV).

## 2. Product analysis

Chronoamperometry experiments were performed at 1.38 V vs. RHE for product analysis and faradaic efficiency (FE) determination. Electrolysis was carried out in a H-type electrolytic cell with an anionic membrane (Alkylmer W-25) under Ar controlled atmosphere. MWCNT-NiMOF(Fc)/NF with a mass loading of 2 mg cm<sup>-2</sup> was used as the working electrode. Hg/HgO electrode and platinum plate were employed as reference electrode and counter electrode, respectively. The anolyte and catholyte used were 1.0 mol L<sup>-1</sup> KOH containing 0.33 mol L<sup>-1</sup> urea, and the volume of solution in each compartment was 30 mL. Gas chromatography (GC 7900, Techcomp, Ar as carrier gas) was selected to analysis the produced N<sub>2</sub>. NO<sub>2</sub><sup>-</sup> were analyzed by ion chromatography (ICS-600, Thermo Scientific) with a Dionex IonPac AS19 – 4 μm 2 × 250 mm column and using 25 mmol L<sup>-1</sup> KOH as the mobile phase.

The faradaic efficiency (FE) of reaction products was calculated from:

$$FE = \frac{m \times n \times F}{Q_{total}} \times 100\%$$

where n is the number of electrons transferred (6 for N<sub>2</sub> and NO<sub>2</sub><sup>-</sup>), F Faraday constant, Q<sub>total</sub> charge, and m total of product (mole).

### 3. Electrochemical measurements

All electrochemical tests were performed by a CHI 660E electrochemical workstation (Shanghai Chenhua) at room temperature. In a three-electrode system, a glassy carbon electrode (GCE) loaded with active material was used as working electrode, with a platinum sheet (1 cm × 1 cm) electrode as counter electrode and a Hg/HgO electrode as reference electrode. The measured potentials were converted to reversible hydrogen electrode (RHE) potentials by the following equation:  $E_{\text{RHE}} = E_{\text{Hg/HgO}} + 0.098 + 0.059 \times \text{pH}$ . The overall urea and water splitting electrolysis cell used a two-electrode system with Pt/C/NF as the cathode and MWCNT-NiMOF(Fc)/NF as the anode.

The working electrode was activated in electrolyte solution for 30 cycles at a scan rate of 100 mV s<sup>-1</sup> between 1.06 V and 1.86 V. Linear sweep voltammetry (LSV) curves were obtained in electrolyte solution at a scan rate of 20 mV s<sup>-1</sup>. Electrochemical impedance spectroscopy (EIS) measurements were conducted in 1.0 mol L<sup>-1</sup> KOH solution, 1.0 mol L<sup>-1</sup> KOH solution with 0.33 mol L<sup>-1</sup> urea and different concentrations of KOH solution with 0.33 mol L<sup>-1</sup> urea, respectively. In the three types of solutions mentioned above, the initial potentials for EIS testing were 1.50 V, 1.38 V and 1.38 V, respectively, with a frequency range from 100 KHz to 0.1 Hz and an amplitude of 5 mV. The long-term stability tests were measured using the chronopotentiometric method. Double layer capacitance ( $C_{\text{dl}}$ ) was calculated based on the cyclic voltammetry (CV) curves obtained in the apparently non-Faraday region at scan rates of 10, 20, 30, 40, and 50 mV s<sup>-1</sup>. The current densities corresponding to

0.91 V were used for the calculation. Tafel plots of UOR and OER were extracted by LSV with a scan rate 5 mV s<sup>-1</sup>. For OER, the backward sweep of the LSV scan was used for constructing the Tafel plot.

#### 4. Equivalent circuit fitting results of Nquist plots obtained in urea solution

Table S1. Equivalent circuit fitting results of Nquist plots obtained in 1.0 mol L<sup>-1</sup> KOH solution with 0.33 mol L<sup>-1</sup> urea.

| Electrodes      | R <sub>s</sub> (Ω cm <sup>2</sup> ) | R <sub>1</sub> (Ω cm <sup>2</sup> ) | R <sub>2</sub> (Ω cm <sup>2</sup> ) |
|-----------------|-------------------------------------|-------------------------------------|-------------------------------------|
| MWCNT-NiMOF(Fc) | 0.813                               | 0.511                               | 1.183                               |
| MWCNT-NiMOF     | 1.015                               | 0.542                               | 1.373                               |
| MWCNT/NiMOF(Fc) | 1.154                               | 1.722                               | 2.283                               |
| NiMOF(Fc)       | 1.675                               | 3.593                               | 3.452                               |
| NiMOF           | 1.879                               | 4.944                               | 9.243                               |

## 5. CV curves of the NiMOF-based material modified electrodes scanned in the non-Faraday interval

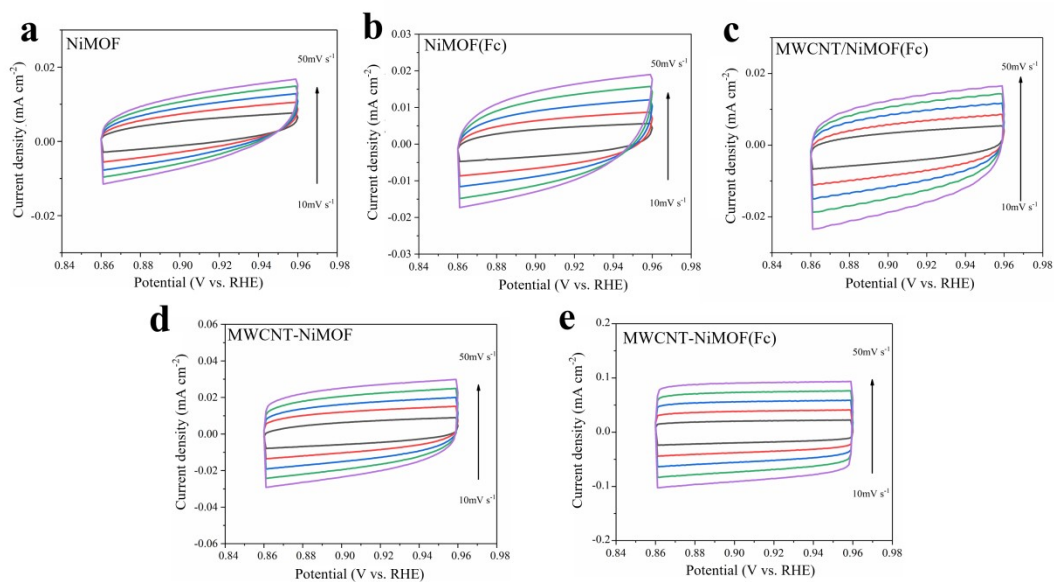

Figure S1. CV curves of (a) NiMOF/GCE, (b) NiMOF(Fc)/GCE, (c) MWCNT/NiMOF(Fc)/GCE (d) MWCNT-NiMOF/GCE, and (e) MWCNT-NiMOF(Fc)/GCE in 1.0 mol L<sup>-1</sup> KOH with 0.33 mol L<sup>-1</sup> urea at different scan rates.



## 6. Comparison of UOR catalytic activity of Ni-based electrocatalysts on GCEs

Table S2. Comparison of UOR catalytic activity of Ni-based electrocatalysts on GCEs.

| Catalysts                               | Potential @<br>10 mA cm <sup>-2</sup><br>(V vs. RHE) | Current<br>density @ 1.6<br>V (vs. RHE)<br>(mA cm <sup>-2</sup> ) | Electrolytes                     | Ref.      |
|-----------------------------------------|------------------------------------------------------|-------------------------------------------------------------------|----------------------------------|-----------|
| Ni-MOF                                  | 1.36                                                 | 120                                                               | urea (0.33 mol L <sup>-1</sup> ) | 1         |
| NiCr/C                                  | 1.38                                                 | 90                                                                | urea (0.33 mol L <sup>-1</sup> ) | 2         |
| $\beta$ -NiMoO <sub>4</sub>             | 1.498                                                | -                                                                 | urea (0.5 mol L <sup>-1</sup> )  | 3         |
| Ni <sub>2</sub> P                       | 1.52                                                 | -                                                                 | urea (0.33 mol L <sup>-1</sup> ) | 4         |
| Ni/C-1                                  | ~1.35                                                | 95.47                                                             | urea (0.33 mol L <sup>-1</sup> ) | 5         |
| Ni <sub>2</sub> P                       | 1.39                                                 | -                                                                 | urea (0.33 mol L <sup>-1</sup> ) | 6         |
| NiMn/C                                  | 1.40                                                 | 42                                                                | urea (0.33 mol L <sup>-1</sup> ) | 7         |
| Ni/Sn dendrites                         | 1.41                                                 | -                                                                 | urea (0.33 mol L <sup>-1</sup> ) | 8         |
| porous rod-like<br>Ni <sub>2</sub> P/Ni | 1.47                                                 | -                                                                 | urea (0.33 mol L <sup>-1</sup> ) | 9         |
| MWCNT-NiMOF(Fc)                         | 1.38                                                 | 173                                                               | urea (0.33 mol L <sup>-1</sup> ) | This work |

## 7. Forward sweep curve of LSV

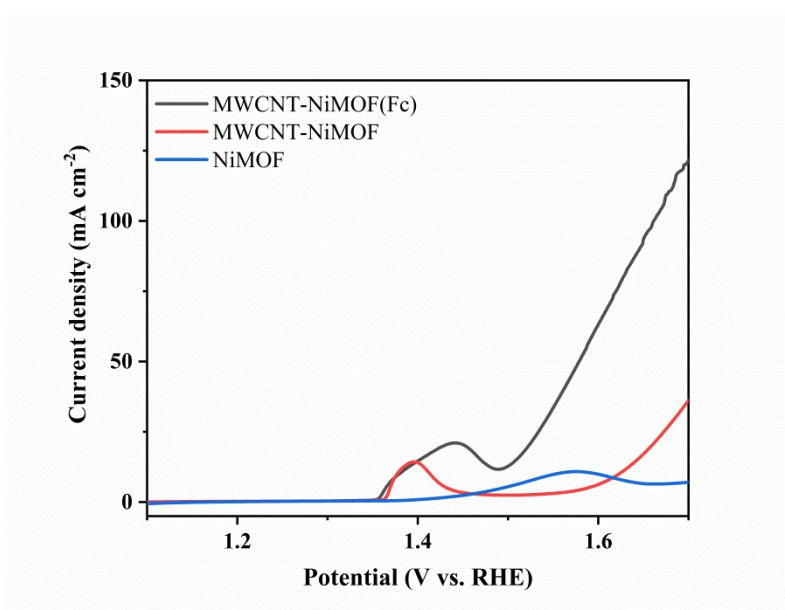

Figure S2. Forward scanning LSV curves of NiMOF/GCE, MWCNT-NiMOF/GCE, and MWCNT-NiMOF(Fc)/GCE in 1.0 mol L<sup>-1</sup> KOH solution.

## 8. Equivalent circuit fitting results of Nyquist plots obtained in KOH solution

Table S3. Equivalent circuit fitting results of Nyquist plots obtained in 1.0 mol L<sup>-1</sup> KOH solution.

| Electrodes      | R <sub>s</sub> (Ω cm <sup>2</sup> ) | R <sub>1</sub> (Ω cm <sup>2</sup> ) | R <sub>2</sub> (Ω cm <sup>2</sup> ) |
|-----------------|-------------------------------------|-------------------------------------|-------------------------------------|
| MWCNT-NiMOF(Fc) | 0.991                               | 0.618                               | 0.778                               |
| MWCNT-NiMOF     | 1.218                               | 0.783                               | 3.671                               |
| NiMOF           | 2.010                               | 2.881                               | 10.563                              |

## 9. Comparison of OER catalytic activity of Ni-based electrocatalysts on GCEs

Table S4. Comparison of OER catalytic activity of Ni-based electrocatalysts on GCEs.

| Catalysts                                                            | Overpotential @<br>10 mA cm <sup>-2</sup><br>(mV) | Tafel slope<br>(mV dec <sup>-1</sup> ) | Electrolytes                   | Ref.      |
|----------------------------------------------------------------------|---------------------------------------------------|----------------------------------------|--------------------------------|-----------|
| Ni <sub>0.6</sub> Co <sub>1.4</sub> P                                | 300                                               | 80                                     | KOH (1.0 mol L <sup>-1</sup> ) | 10        |
| Ni-MOF(BTC)                                                          | 346                                               | 64                                     | KOH (1.0 mol L <sup>-1</sup> ) | 11        |
| NP/NiO                                                               | 332                                               | 65.6                                   | KOH (1.0 mol L <sup>-1</sup> ) | 12        |
| NiFe-LDH                                                             | 275                                               | 56.7                                   | KOH (1.0 mol L <sup>-1</sup> ) | 13        |
| Ni/CoMoS <sub>4</sub> /Ni <sub>3</sub> S <sub>2</sub>                | 338                                               | 53                                     | KOH (1.0 mol L <sup>-1</sup> ) | 14        |
| Ni-Doped AlOOH                                                       | 320                                               | 63                                     | KOH (1.0 mol L <sup>-1</sup> ) | 15        |
| Ni-BDC@NiS                                                           | 295                                               | 62                                     | KOH (1.0 mol L <sup>-1</sup> ) | 16        |
| Mo-Ni-Se                                                             | 397                                               | -                                      | KOH (1.0 mol L <sup>-1</sup> ) | 17        |
| Co <sub>0.95</sub> Cr <sub>0.05</sub> Fe <sub>2</sub> O <sub>4</sub> | 293.3                                             | 76                                     | KOH (1.0 mol L <sup>-1</sup> ) | 18        |
| MWCNT-NiMOF(Fc)                                                      | 274                                               | 42                                     | KOH (1.0 mol L <sup>-1</sup> ) | This work |

**10. Equivalent circuit fitting results of Nquist plots obtained in different concentrations of KOH solution with 0.33 mol L<sup>-1</sup> urea**

Table S5. Equivalent circuit fitting results of Nquist plots obtained in different concentrations of

KOH solution with 0.33 mol L<sup>-1</sup> urea.

| Concentrations of KOH (mol L <sup>-1</sup> ) | R <sub>s</sub> (Ω cm <sup>2</sup> ) | R <sub>1</sub> (Ω cm <sup>2</sup> ) | R <sub>2</sub> (Ω cm <sup>2</sup> ) |
|----------------------------------------------|-------------------------------------|-------------------------------------|-------------------------------------|
| 0.25                                         | 0.889                               | 3.877                               | 2.374                               |
| 0.5                                          | 0.478                               | 1.351                               | 1.784                               |
| 1.0                                          | 0.276                               | 0.703                               | 0.776                               |
| 2.0                                          | 0.178                               | 0.583                               | 0.856                               |
| 3.0                                          | 0.121                               | 0.643                               | 0.667                               |
| 4.0                                          | 0.096                               | 0.598                               | 0.784                               |
| 5.0                                          | 0.108                               | 1.196                               | 0.799                               |

## 11. Calibration curves for N<sub>2</sub> and NO<sub>2</sub><sup>-</sup> determination

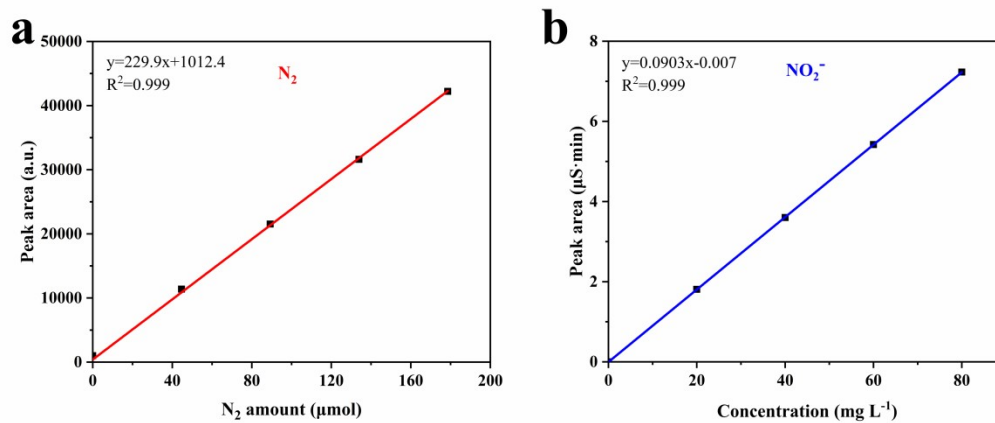

Figure S3. Calibration curves for N<sub>2</sub> (a) and NO<sub>2</sub><sup>-</sup> (b) determination.

## 12. Faradaic efficiency of $\text{N}_2$ and $\text{NO}_2^-$

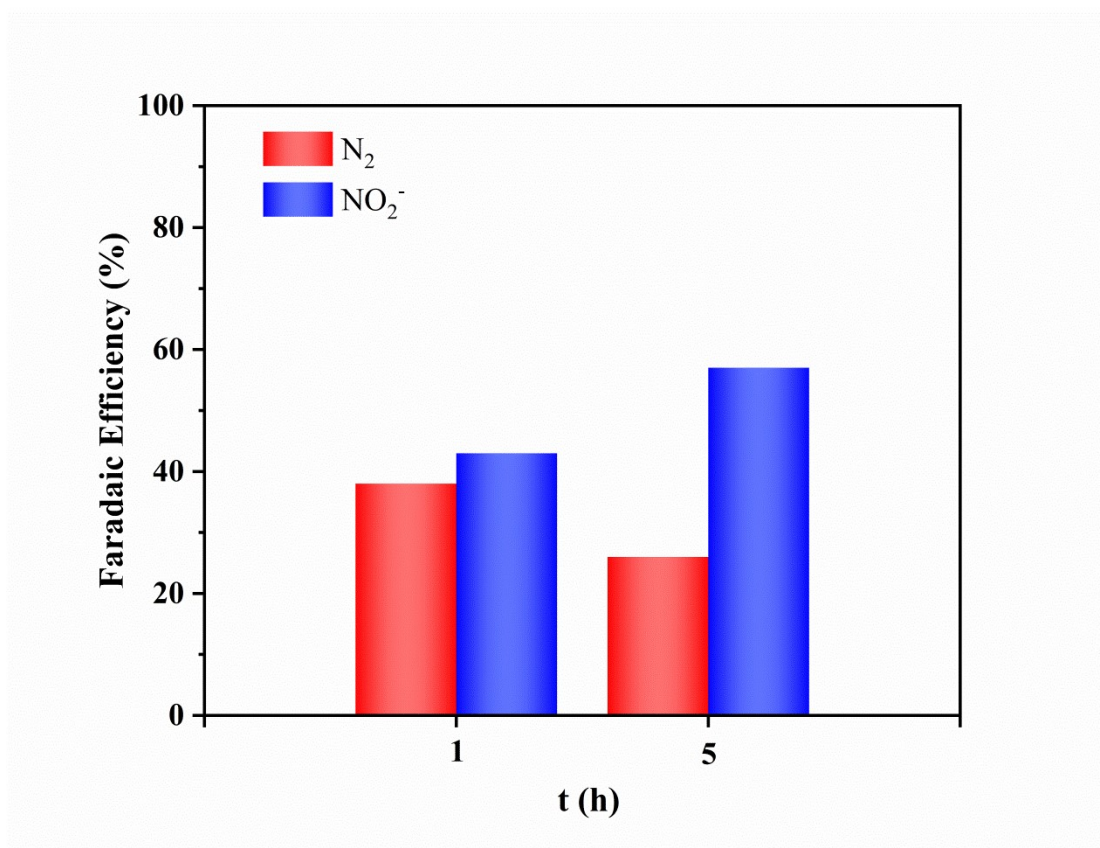

Figure S4. Faradaic efficiency of  $\text{N}_2$  and  $\text{NO}_2^-$

## References

1. D. Zhu, C. Guo, J. Liu, L. Wang, Y. Du and S. Z. Qiao, *Chemical Communications*, 2017, **53**, 10906-10909.
2. R. K. Singh and A. Schechter, *ChemCatChem*, 2017, **9**, 3374-3379.
3. K. Hu, S. Jeong, G. Elumalai, S. Kukuluri, J.-i. Fujita and Y. Ito, *ACS Applied Energy Materials*, 2020, **3**, 7535-7542.
4. H. Liu, S. Zhu, Z. Cui, Z. Li, S. Wu and Y. Liang, *Nanoscale*, 2021, **13**, 1759-1769.
5. L. Wang, L. Ren, X. Wang, X. Feng, J. Zhou and B. Wang, *ACS Applied Materials & Interfaces*, 2018, **10**, 4750-4756.
6. D. Yang, Y. Gu, X. Yu, Z. Lin, H. Xue and L. Feng, *ChemElectroChem*, 2018, **5**, 659-664.
7. N. A. M. Barakat, M. Alajami, Y. Al Haj, M. Obaid and S. Al-Meer, *Catalysis Communications*, 2017, **97**, 32-36.
8. R. K. Singh, P. Subramanian and A. Schechter, *ChemElectroChem*, 2017, **4**, 1037-1043.
9. Q. Li, X. Li, J. Gu, Y. Li, Z. Tian and H. Pang, *Nano Research*, 2020, **14**, 1405-1412.
10. B. Qiu, L. Cai, Y. Wang, Z. Lin, Y. Zuo, M. Wang and Y. Chai, *Advanced Functional Materials*, 2018, **28**, 1706008.
11. V. Maruthapandian, S. Kumaraguru, S. Mohan, V. Saraswathy and S. Muralidharan, *ChemElectroChem*, 2018, **5**, 2795-2807.
12. P. Bhanja, Y. Kim, B. Paul, Y. V. Kaneti, A. A. Alothman, A. Bhaumik and Y. Yamauchi, *Chemical Engineering Journal*, 2021, **405**, 126803.
13. M. Liu, L. Kong, X. Wang, J. He and X. H. Bu, *Small*, 2019, **15**, 136336.
14. P. Hu, Z. Jia, H. Che, W. Zhou, N. Liu, F. Li and J. Wang, *Journal of Power Sources*, 2019, **416**, 95-103.
15. Y. Zhou and H. C. Zeng, *ACS Sustainable Chemistry & Engineering*, 2019, **7**, 5953-5962.
16. P. He, Y. Xie, Y. Dou, J. Zhou, A. Zhou, X. Wei and J. R. Li, *ACS Applied Materials & Interfaces*, 2019, **11**, 41595-41601.
17. H. Yang, Y. Huang, W. Y. Teoh, L. Jiang, W. Chen, L. Zhang and J. Yan, *Electrochimica Acta*, 2020, **349**, 136336.
18. S. Pan, J. Yu, Y. Zhang and B. Li, *Materials Letters*, 2020, **262**, 127027.
